# Supplementary material
Source: Springer Nature journal article supplement (https://www.springermedizin.de/resource/supplementary/12911_2012_606_MOESM2_ESM.pdf/9526046)

8,086 patients seen in clinic between  
July 1, 2009 and July 1, 2010

188 – no eGFR

7,898 subjects

6,804 – most recent eGFR > 60

1,094 subjects

228 – no prior eGFR < 60

866 subjects

85 – ESRD

781 subjects included in the present  
analyses

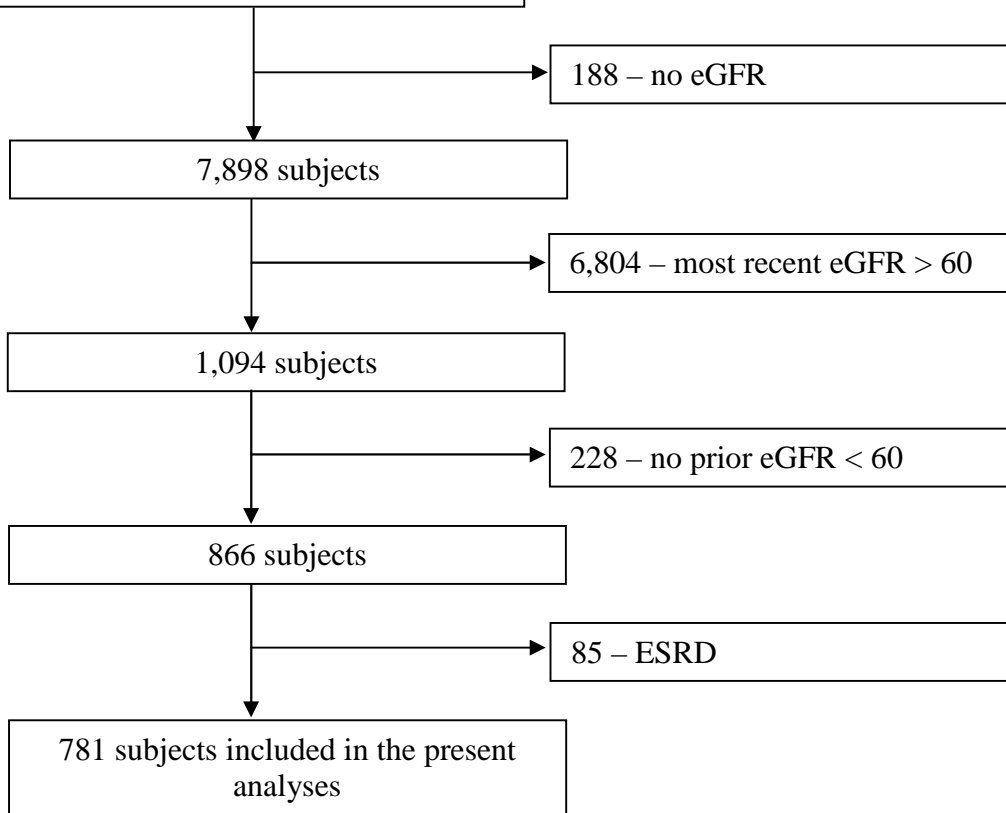

Supplement: MOESM2 [file 9526046]
